# Supplementary material
Source: publisher figshare collection journal article supplement (https://karger.figshare.com/articles/dataset/_/7745735)

Figure S2.

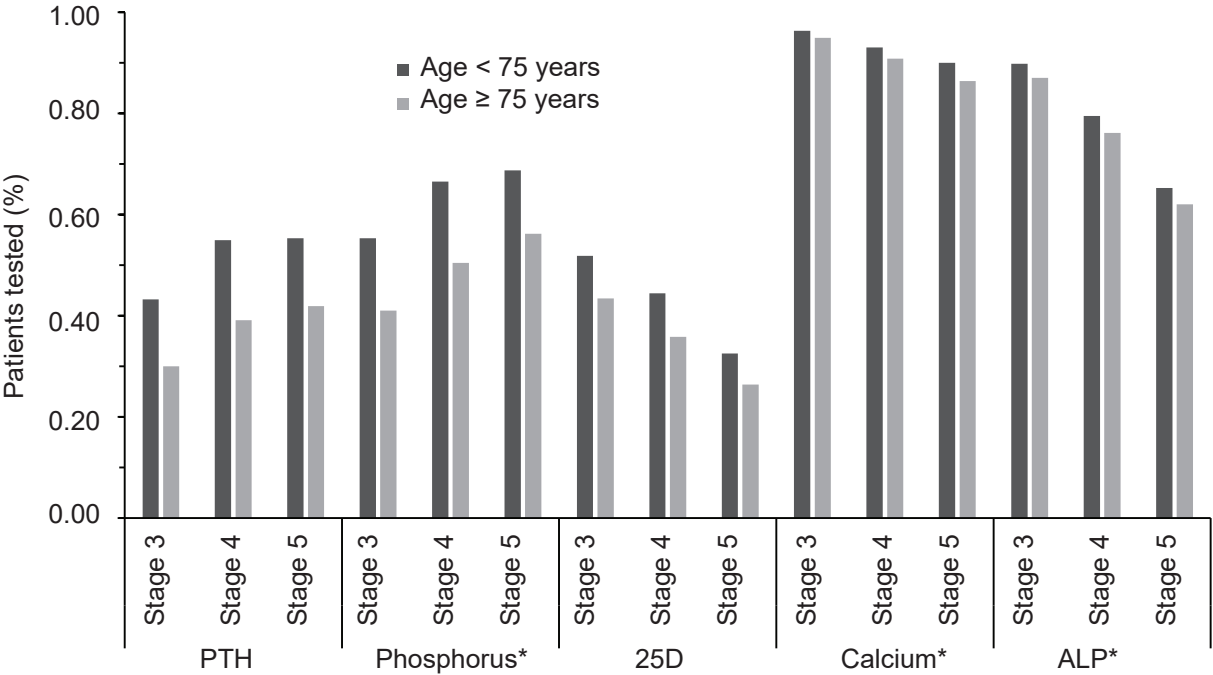

Supplement: Supplementary file 1 [file 1]

Figure S3.

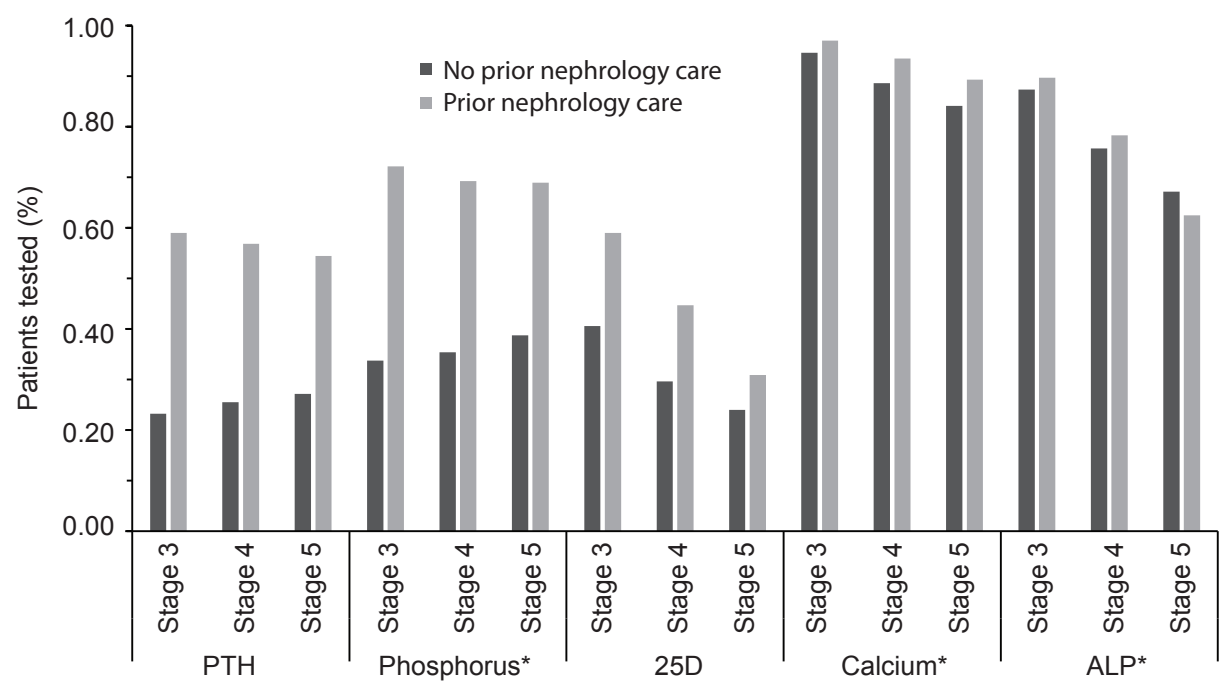

Supplement: Supplementary file 2 [file 1]

Figure S1.

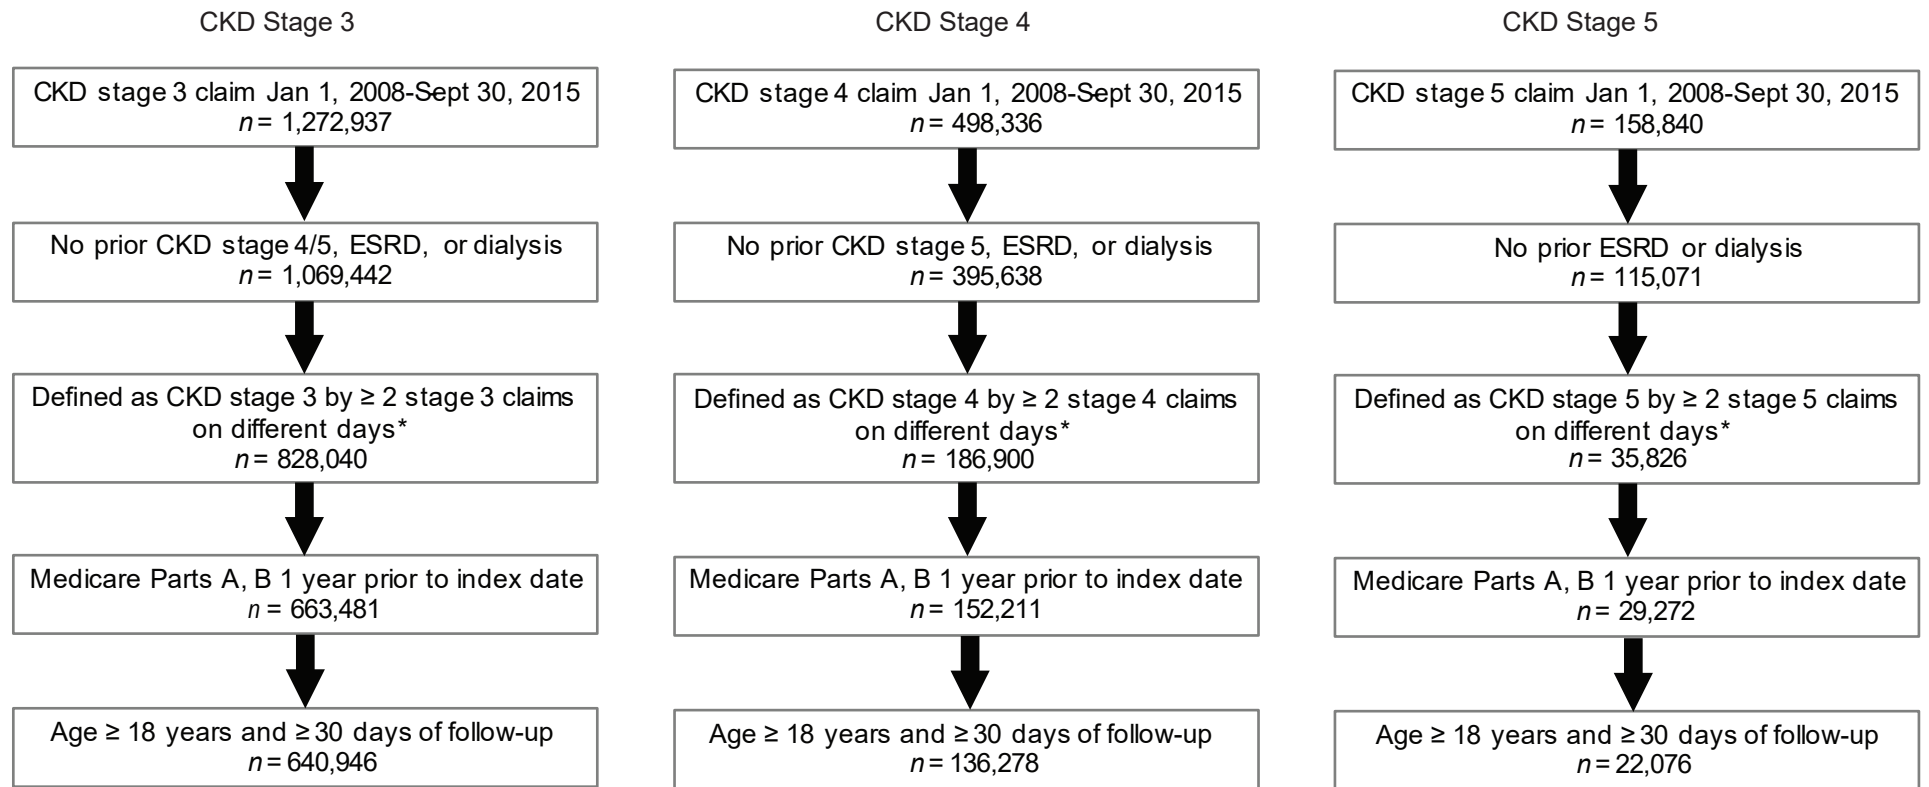

\*See Materials and Methods text for a complete description.

Supplement: Supplementary file 3 [file 1]
